# Supplementary material
Source: HighWire-hosted journal article supplement (https://www.cmaj.ca/highwire/filestream/58161/field_highwire_adjunct_files/0/delivery-aben--online_appendix_1.pdf)
Supplement: delivery-aben--online_appendix_1.pdf [file delivery-aben--online_appendix_1.pdf]

Appendix 1: Proportion of cesarean and vaginal deliveries attended by regular-care and on-call obstetricians

| Outcome                                     | Obstetrician type; % of deliveries |                     | Crude OR (95% CI) | Adjusted* OR (95% CI) | p value |
|---------------------------------------------|------------------------------------|---------------------|-------------------|-----------------------|---------|
|                                             | Regular care<br>n = 21 779         | On call<br>n = 6553 |                   |                       |         |
| <b>Cesarean section†</b>                    |                                    |                     |                   |                       |         |
| All indications                             | 11.4                               | 11.9                | 1.05 (0.96-1.14)  | 1.13 (1.03-1.24)      | < 0.01  |
| Dystocia                                    | 7.4                                | 7.2                 | 0.97 (0.87-1.08)  | 1.10 (0.98-1.24)      | 0.10    |
| Nonreassuring fetal heart tracing           | 1.9                                | 3.1                 | 1.70 (1.44-2.02)  | 1.73 (1.45-2.07)      | < 0.001 |
| Failed vaginal birth after cesarean section | 0.6                                | 0.8                 | 1.22 (0.88-1.68)  | 1.31 (0.92-1.86)      | 0.14    |
| Other                                       | 1.5                                | 0.8                 | 0.52 (0.38-0.69)  | 0.44 (0.33-0.59)      | < 0.001 |
| <b>Vaginal delivery‡</b>                    |                                    |                     |                   |                       |         |
| Instrumental delivery                       | 11.3                               | 11.0                | 0.97 (0.88-1.07)  | 0.96 (0.87-1.06)      | 0.40    |
| Forceps                                     | 6.4                                | 6.7                 | 1.06 (0.94-1.19)  | 1.02 (0.90-1.15)      | 0.80    |
| Vacuum                                      | 5.3                                | 4.8                 | 0.90 (0.79-1.03)  | 0.92 (0.80-1.06)      | 0.27    |
| Episiotomy                                  | 42.9                               | 38.5                | 0.83 (0.79-0.87)  | 0.77 (0.72-0.82)      | < 0.001 |
| Third- or fourth-degree tear                | 6.4                                | 7.9                 | 1.25 (1.12-1.40)  | 1.21 (1.07-1.36)      | < 0.01  |

Note: OR = odds ratio, CI = confidence interval.

\*Adjusted for maternal age, parity, body mass index  $\geq 30$  kg/m<sup>2</sup>, smoking, previous cesarean section, pre-existing and gestational diabetes, pre-eclampsia, induction of labour, use of oxytocin, use of epidural analgesia, gestational age, birth weight and first or second 5 years of the study period.

†Percentage of all deliveries.

‡Percentage of vaginal deliveries only.
